# Supplementary material for: Ni-Modified Ag/SiO2 Catalysts for Selective Hydrogenation of Dimethyl Oxalate to Methyl Glycolate
Source: MDPI journal article supplement (doi:10.3390/nano12030407), 2022-01-26
Supplement: s1 [file s1]

# Ni-Modified Ag/SiO<sub>2</sub> Catalysts for Selective Hydrogenation of Dimethyl Oxalate to Methyl Glycolate

Shuai Cheng <sup>1</sup>, Tao Meng <sup>1,\*</sup>, Dongsen Mao <sup>1,\*</sup>, Xiaoming Guo <sup>1</sup>, Jun Yu <sup>1</sup> and Zhen Ma <sup>2</sup>

<sup>1</sup> School of Chemical and Environmental Engineering, Shanghai Institute of Technology, Shanghai 201418, China; 156061301@mail.sit.edu.cn (S.C.); guoxiaoming@sit.edu.cn (X.G.); yujun@sit.edu.cn (J.Y.)

<sup>2</sup> Department of Environmental Science and Engineering, Fudan University, Shanghai 200438, China; zhenma@fudan.edu.cn

\* Correspondence: mengtao@sit.edu.cn (T.M.); dsmao@sit.edu.cn (D.M.)

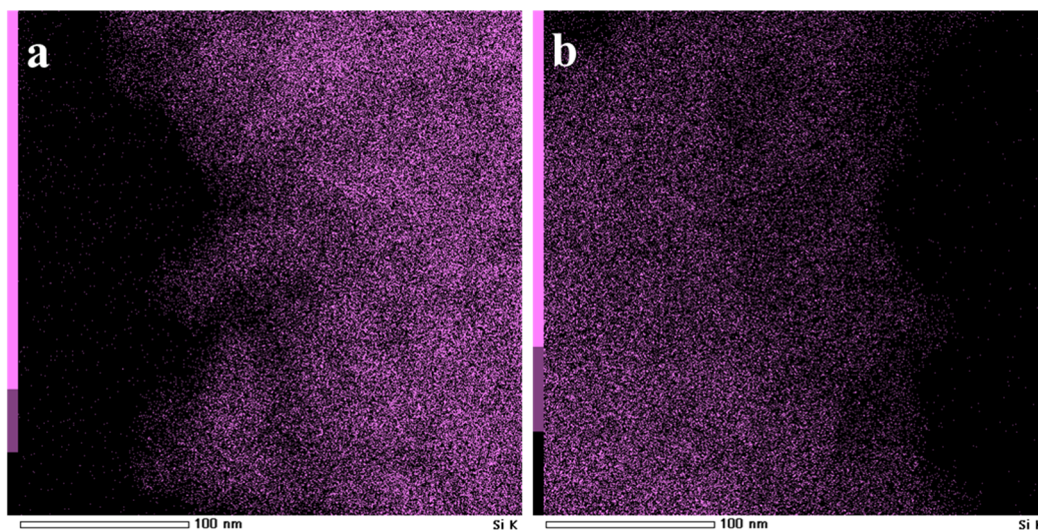

**Figure S1.** Additional EDX-mapping images of Ag/SiO<sub>2</sub> (a) and Ag-0.5%Ni/SiO<sub>2</sub> (b).
